Correction

# Correction: Combined Effects of Smoking and Alcohol on Metabolic Syndrome: The LifeLines Cohort Study

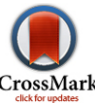

## The *PLOS ONE* Staff

The fourth author's name is spelled incorrectly. The correct name is: H. Marika Boezen.

## Reference

1. Slagter SN, van Vliet-Ostapchouk JV, Vonk JM, Boezen HM, Dullaart RPF, et al. (2014) Combined Effects of Smoking and Alcohol on Metabolic Syndrome: The LifeLines Cohort Study. *PLoS ONE* 9(4): e96406. doi:10.1371/journal.pone.0096406

**Citation:** The *PLOS ONE* Staff (2014) Correction: Combined Effects of Smoking and Alcohol on Metabolic Syndrome: The LifeLines Cohort Study. *PLoS ONE* 9(8): e105157. doi:10.1371/journal.pone.0105157

**Published:** August 5, 2014

**Copyright:** © 2014 The *PLOS ONE* Staff. This is an open-access article distributed under the terms of the Creative Commons Attribution License, which permits unrestricted use, distribution, and reproduction in any medium, provided the original author and source are credited.
